# Supplementary material for: Immobilization of catalase on electrospun nanofibrous membranes modified with bovine serum albumin or collagen: Coupling site-dependent activity and protein-dependent stability
Source: Royal Society of Chemistry journal article supplement (doi:10.1039/b902637a), 2009-01-01
Supplement: b902637a.pdf [file b902637a.pdf]

## Electronic Supplementary Information

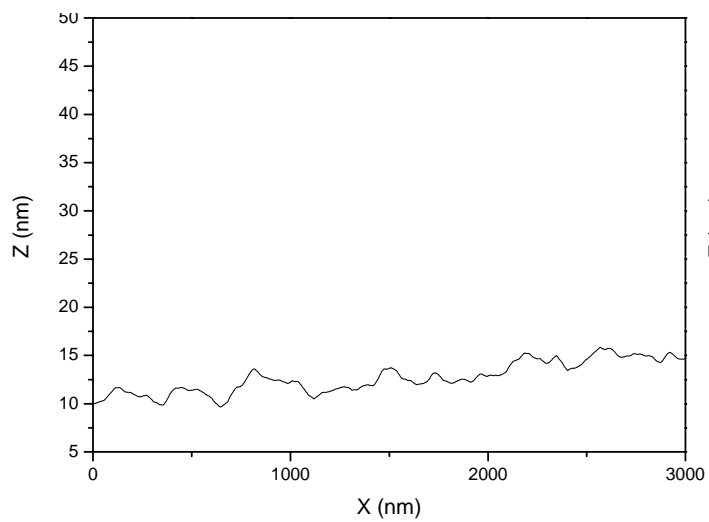

**a**

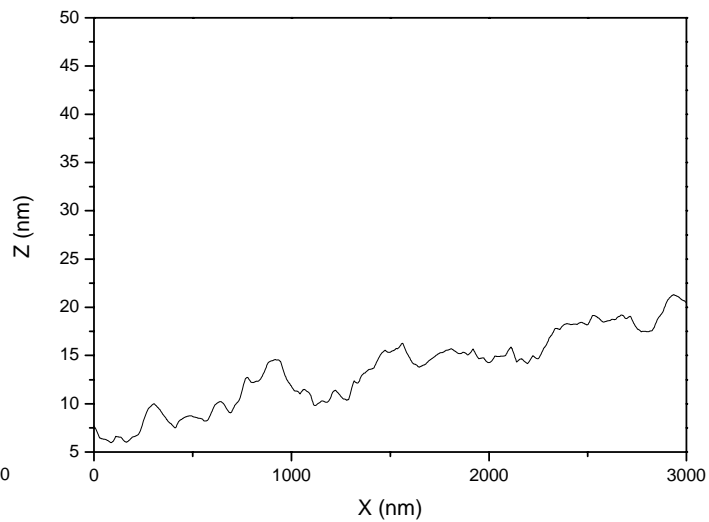

**b**

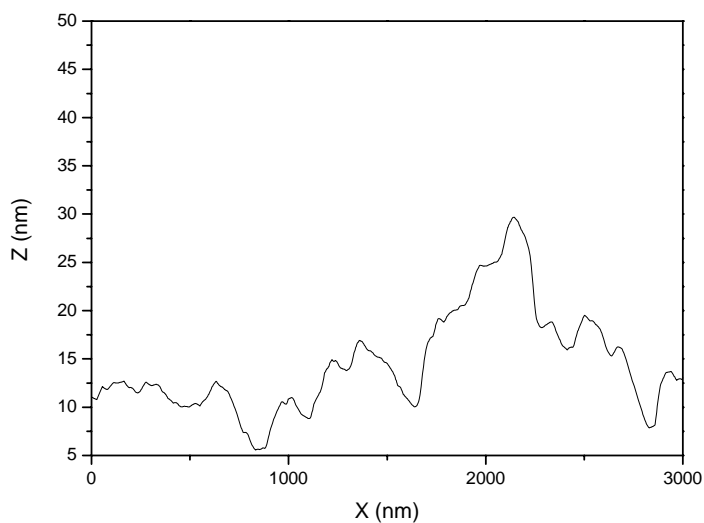

**c**

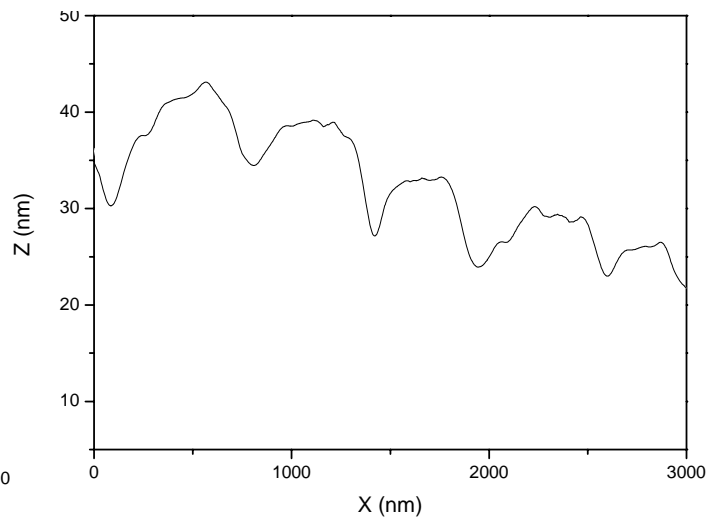

**d**

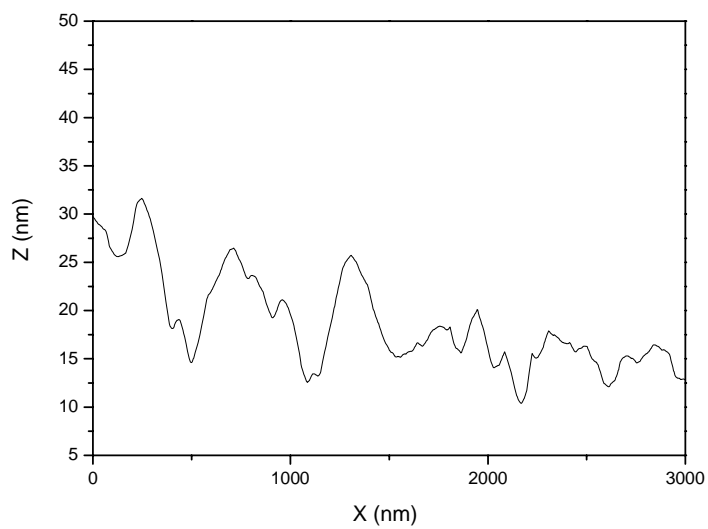

**e**

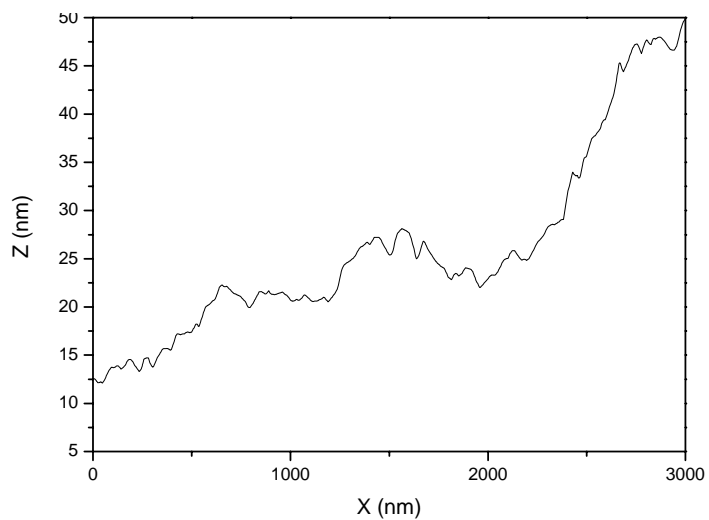

**f**

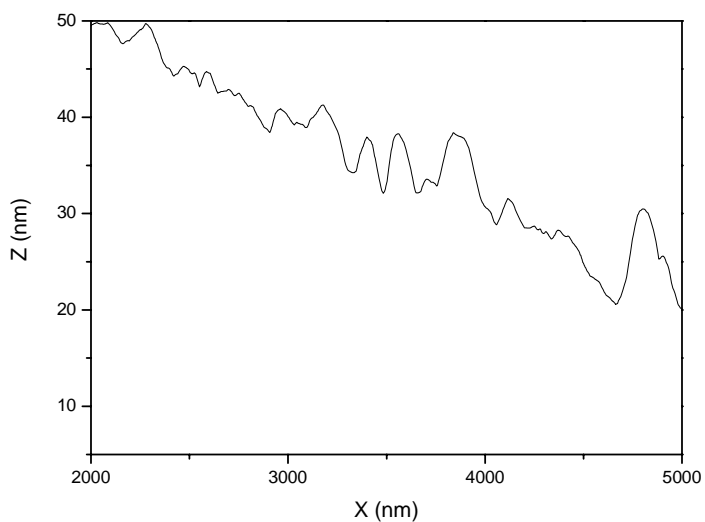

**g**

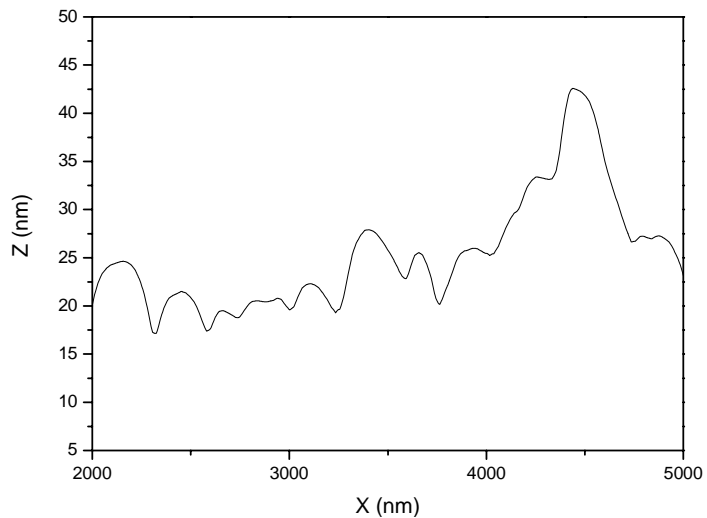

**h**

S1. Roughness analysis for AFM images of (a) unmodified; (b) heated unmodified; (c) BSA-modified; (d) heated BSA-modified; (e) catalase-immobilized; (f) heated catalase-immobilized; (g) collagen-modified; (h) heated collagen-modified dense membranes.
